# Supplementary material for: Quinazolinone-1,2,3-triazole-acetamide conjugates as potent α-glucosidase inhibitors: synthesis, enzyme inhibition, kinetic analysis, and molecular docking study
Source: Royal Society of Chemistry journal article supplement (doi:10.1039/d2md00297c), 2023-01-01

## Supplementary file

# Compound 9a

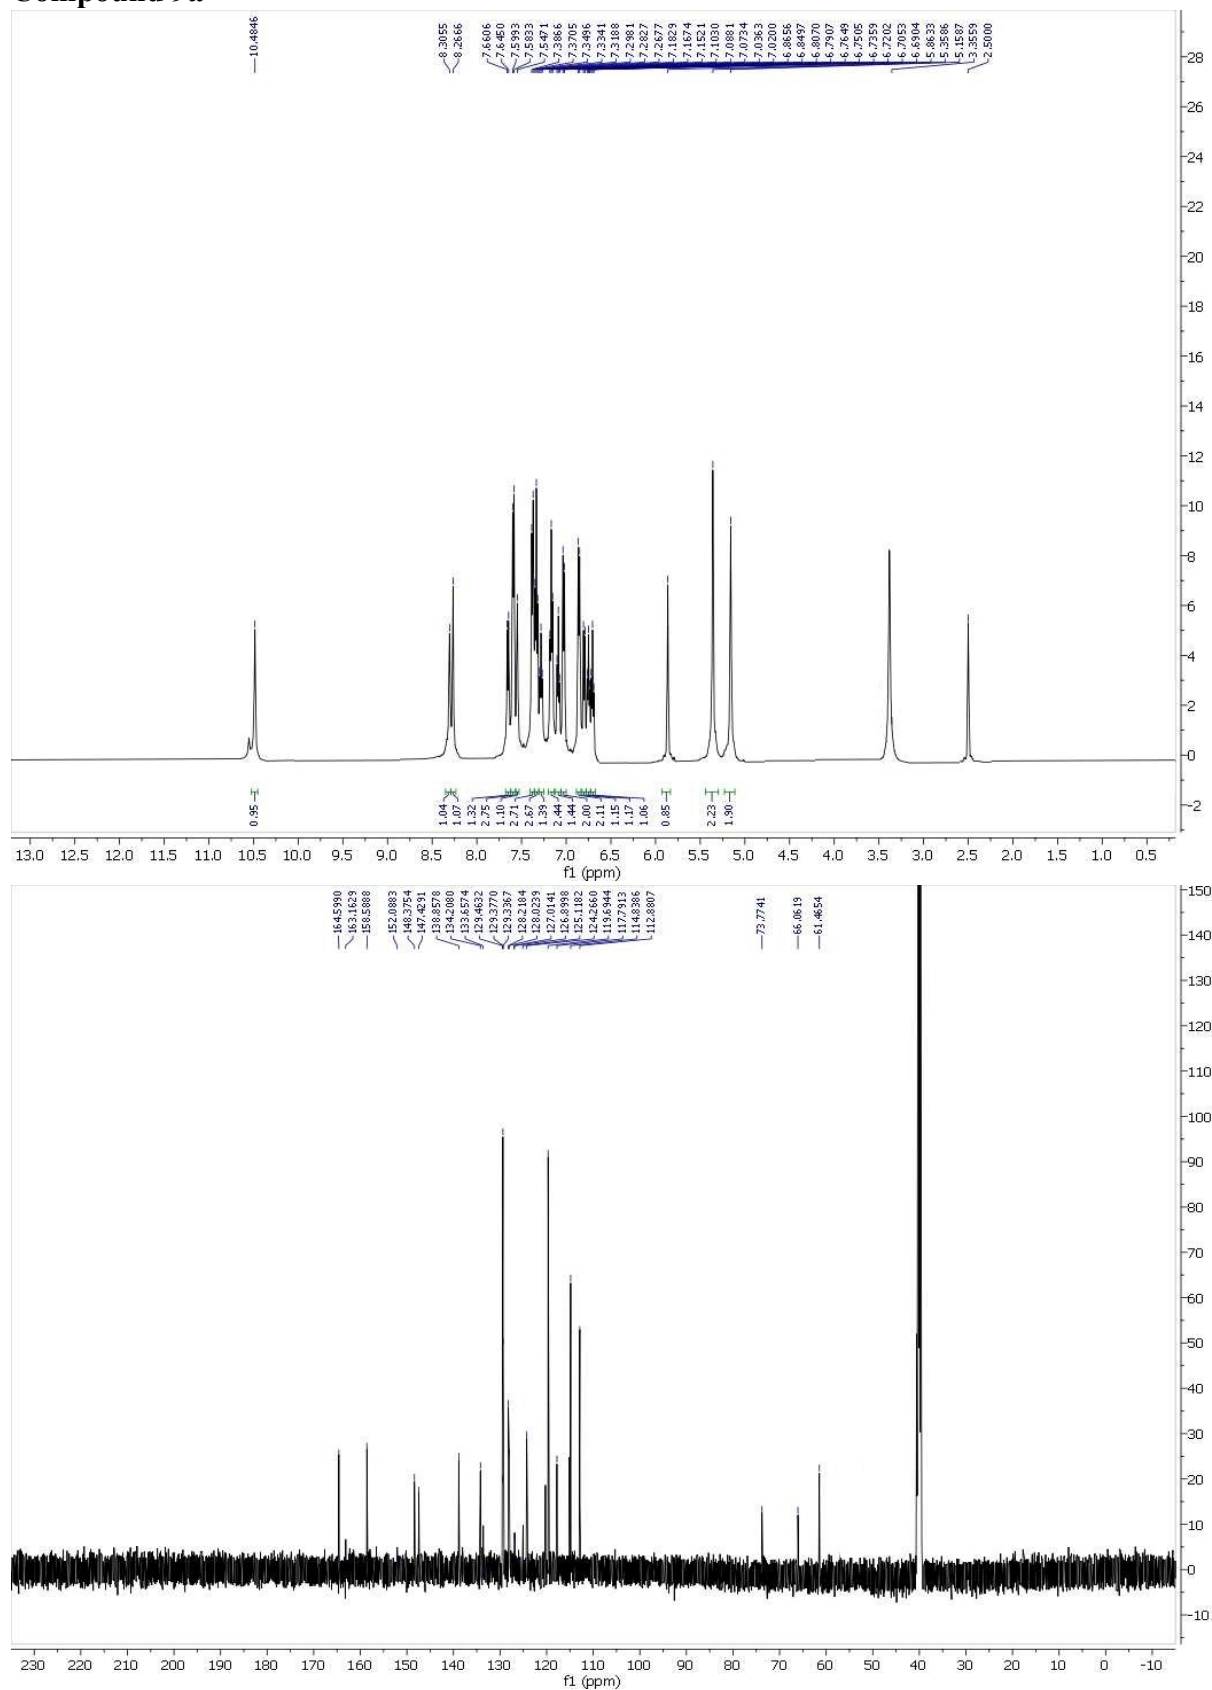

# Compound 9c

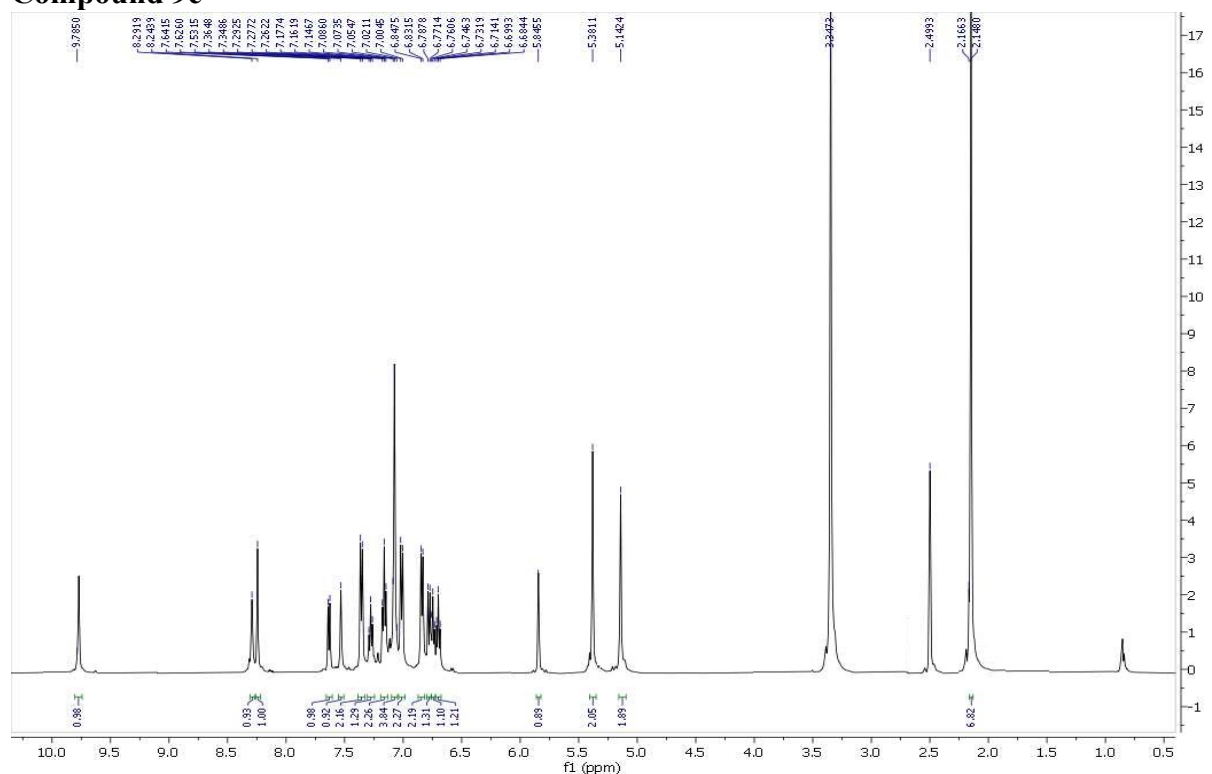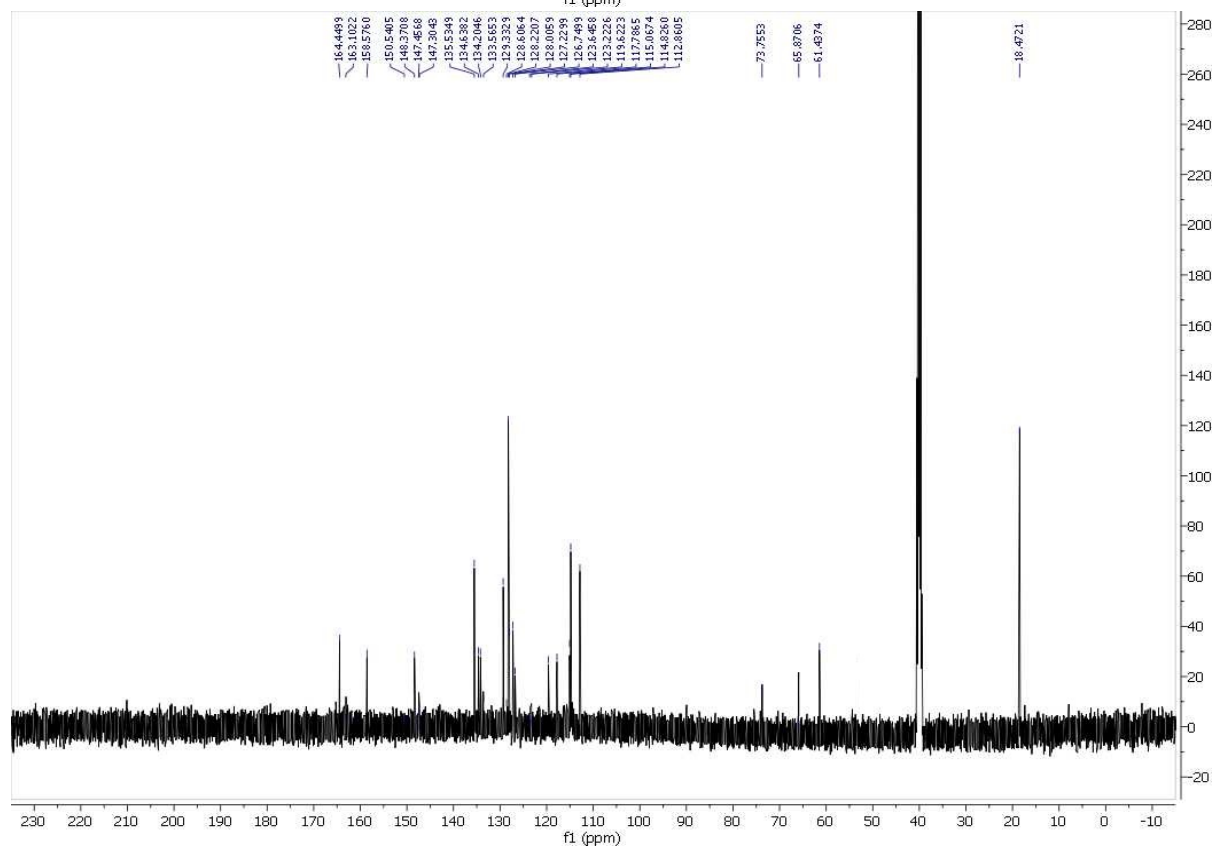

# Compound 9d

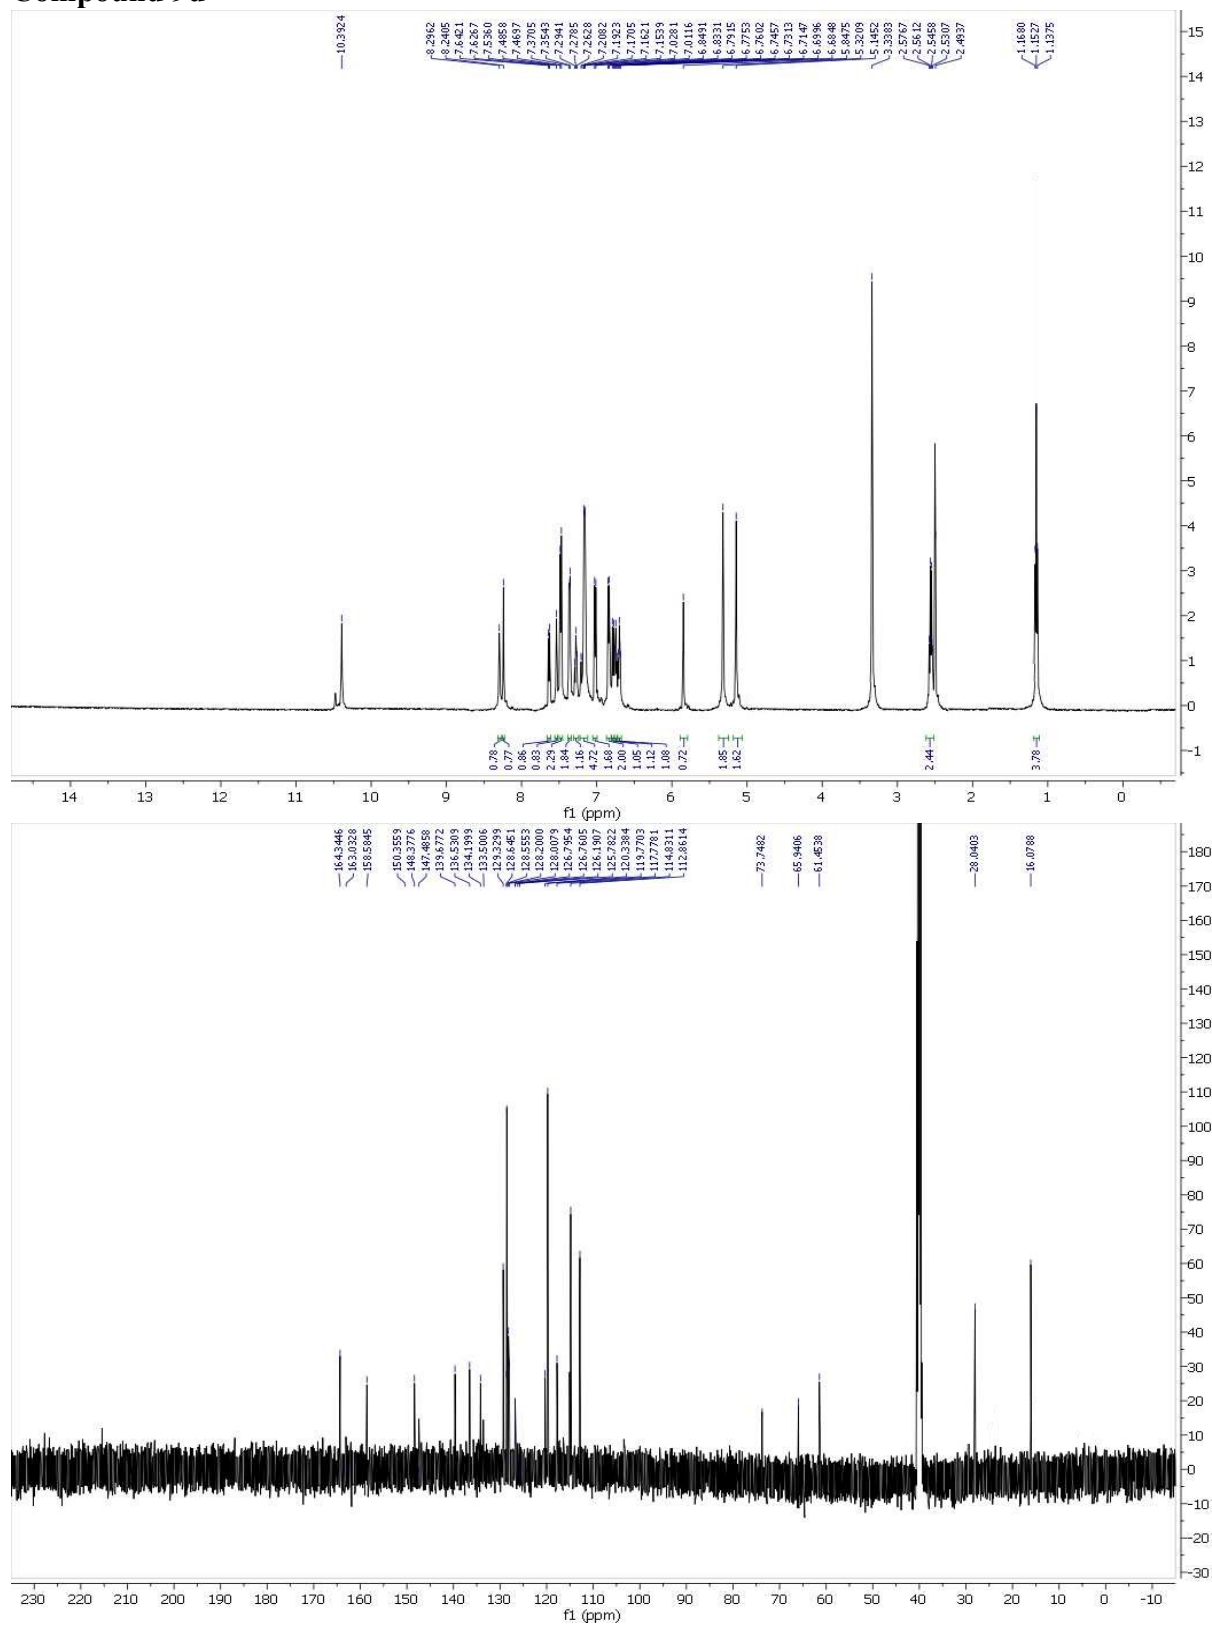

# Compound 9e

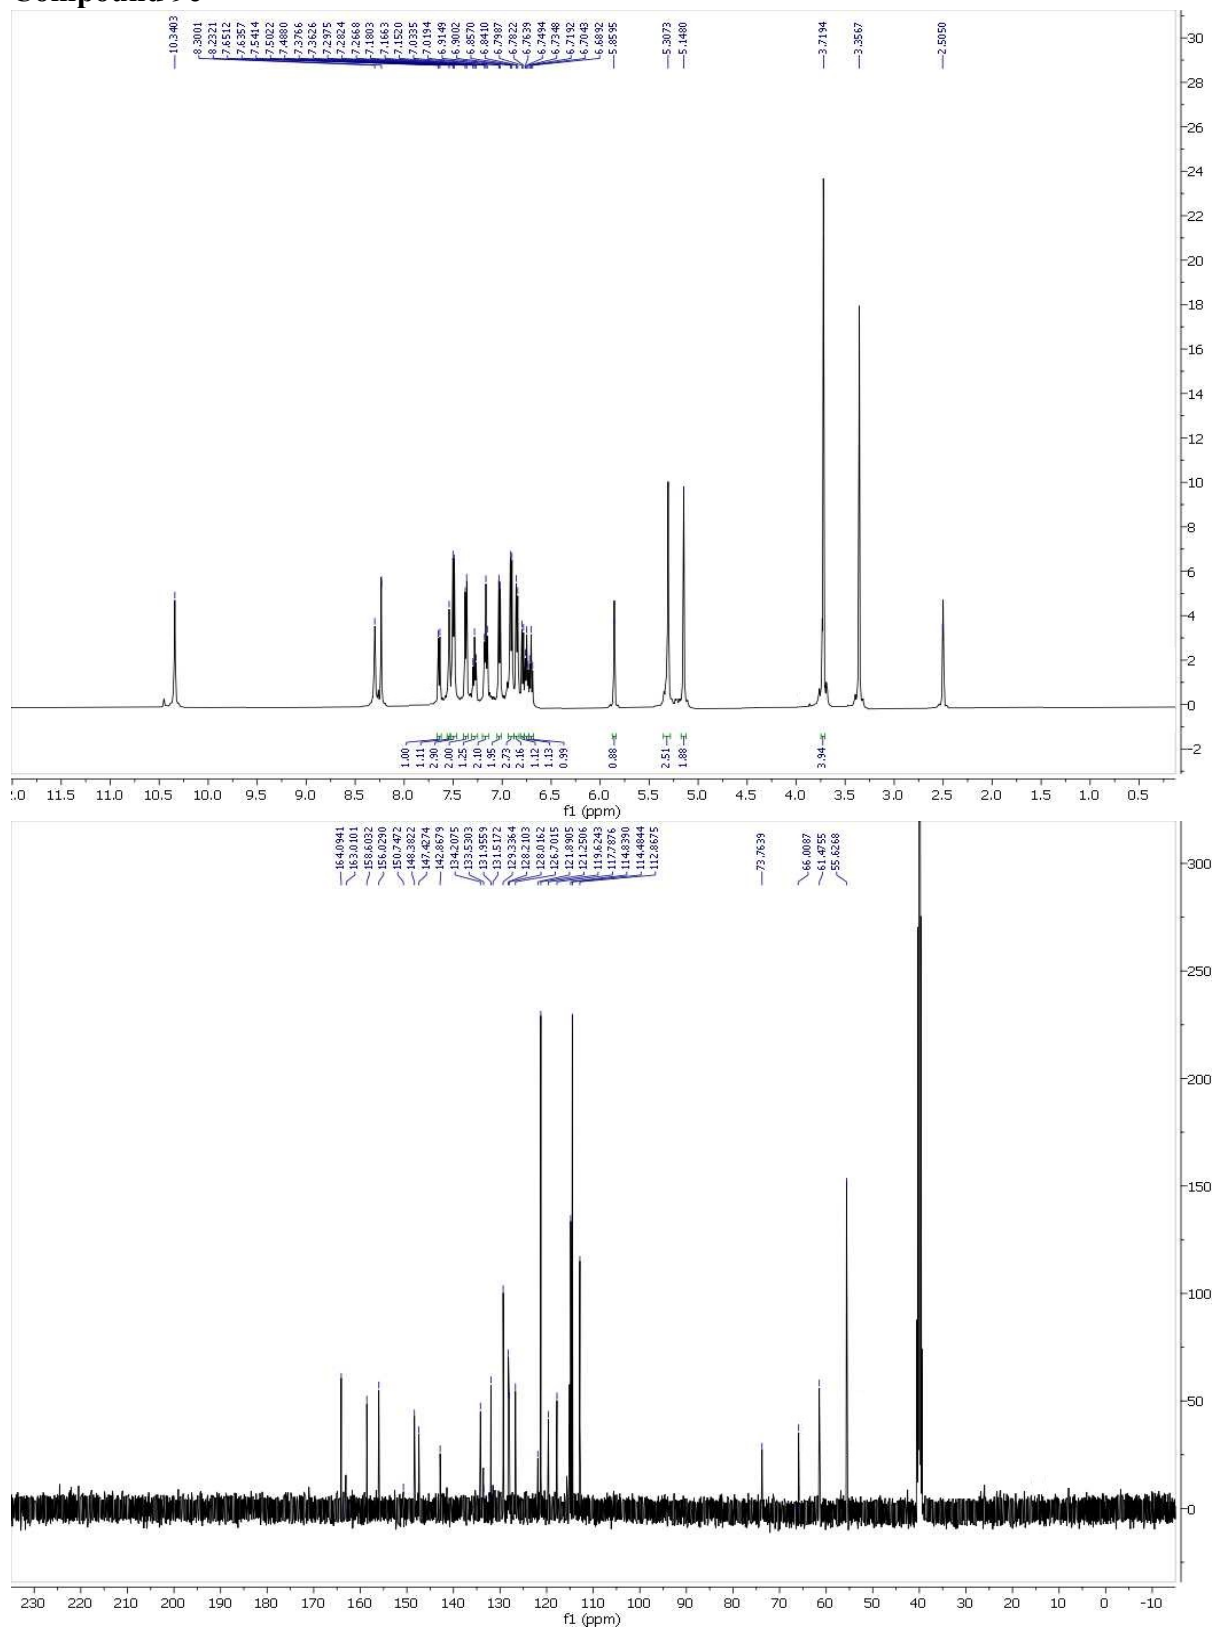



# Compound 9g

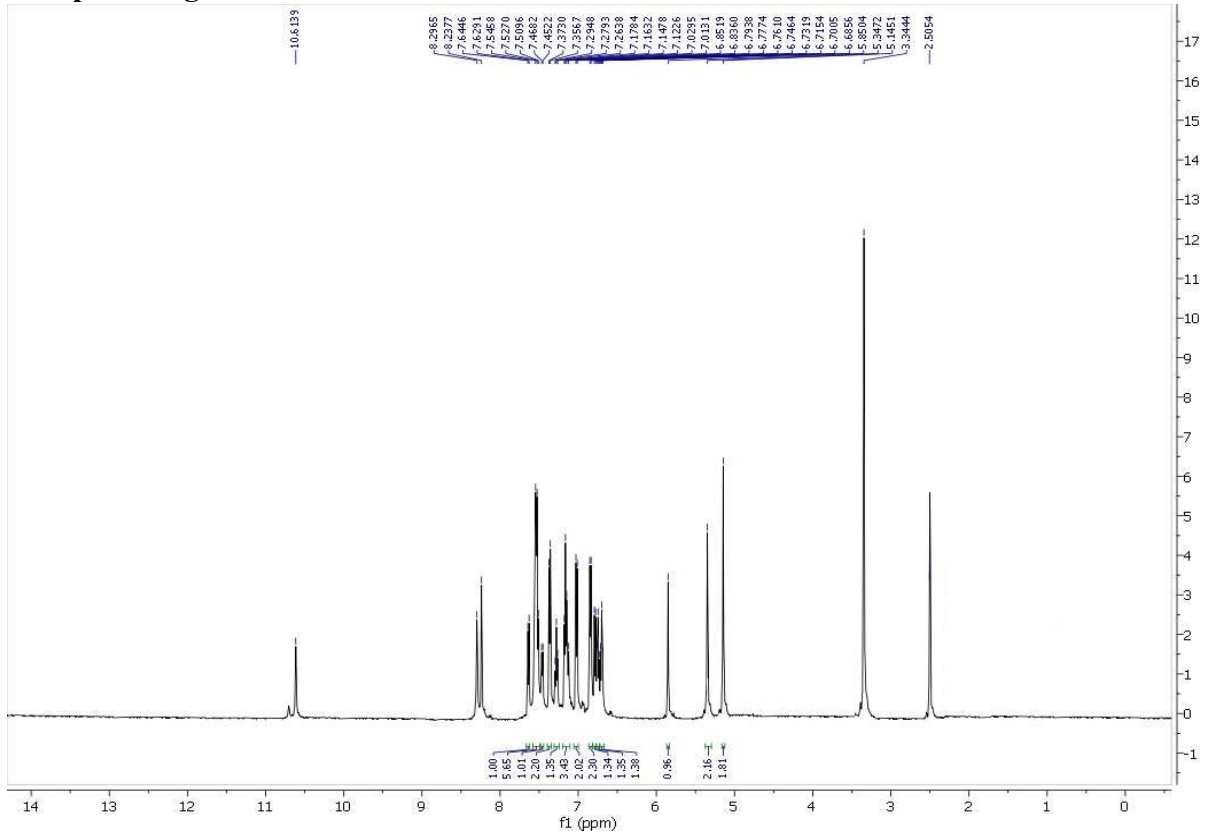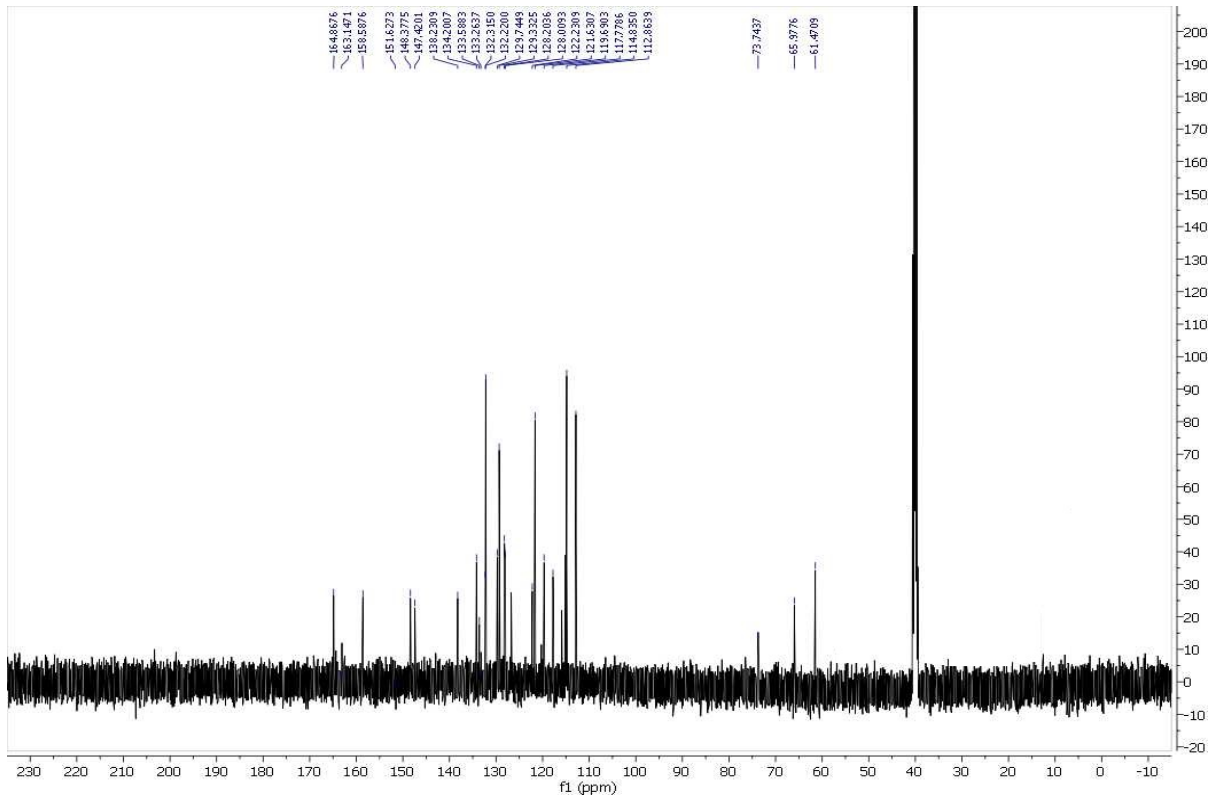

# Compound 9h

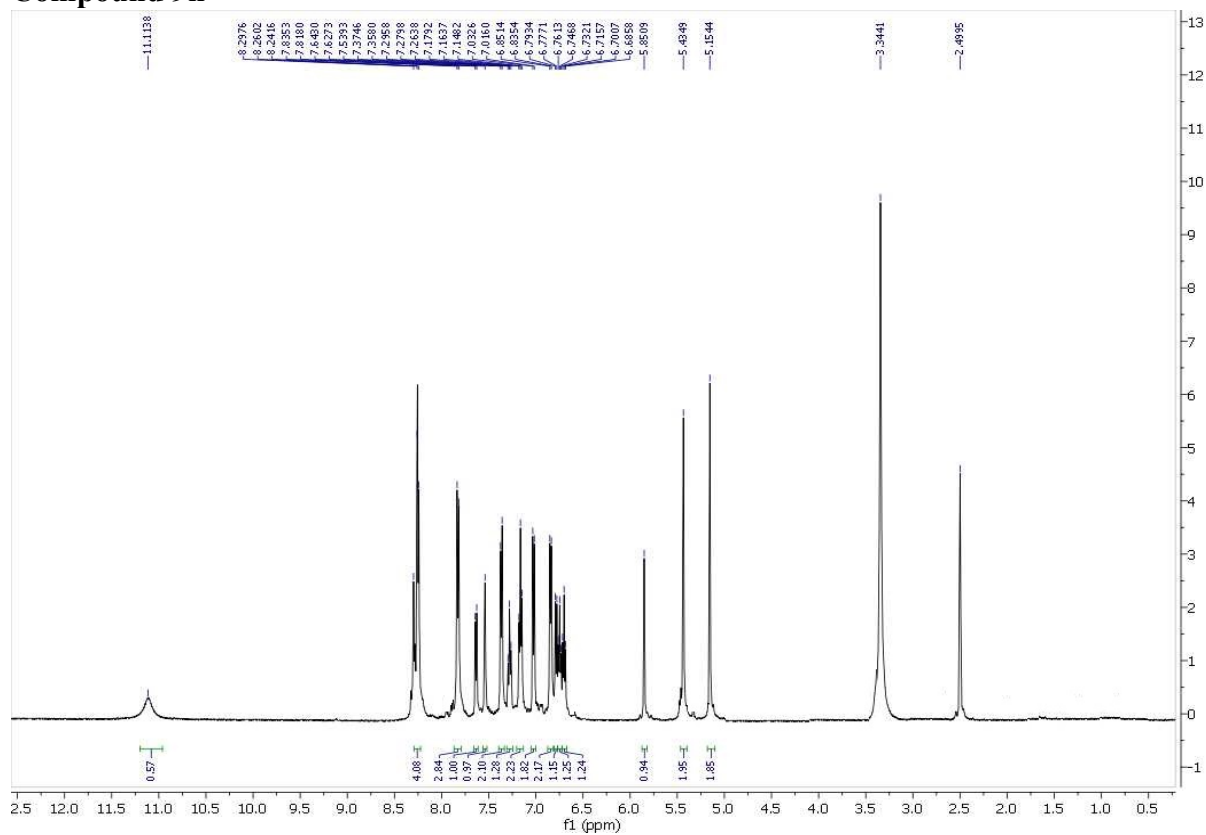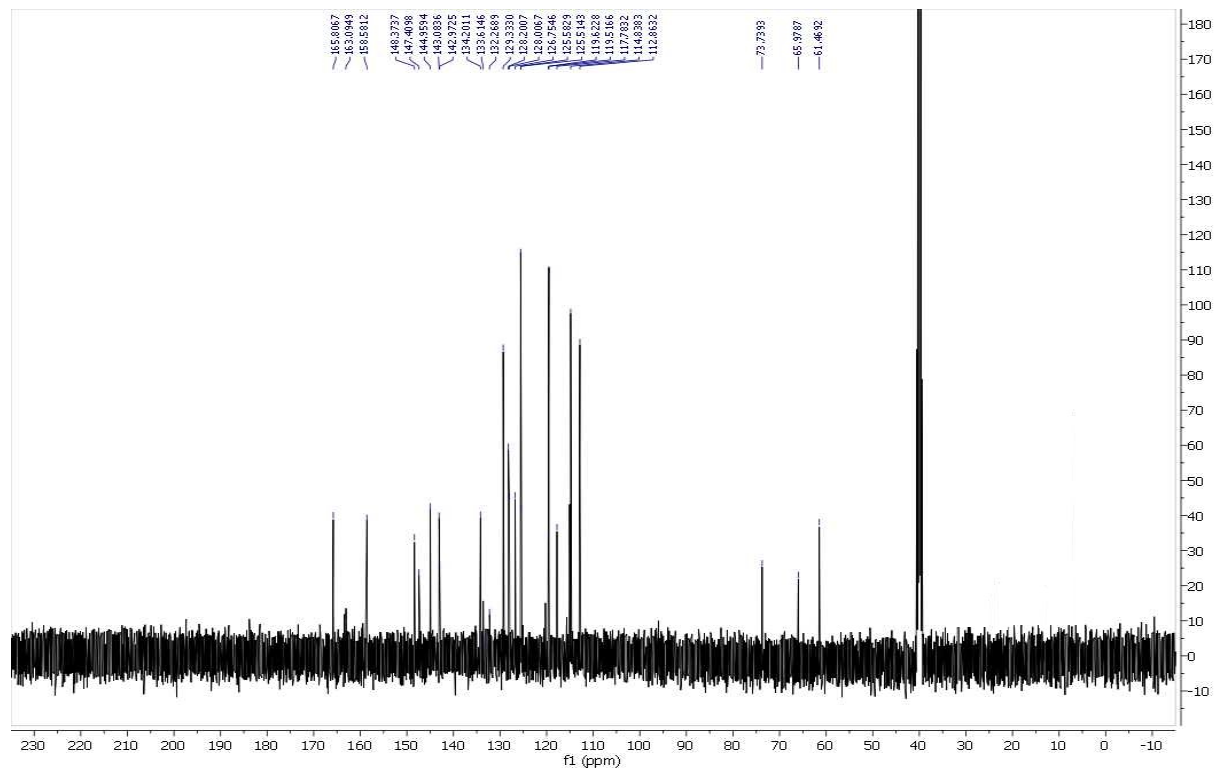



# Compound 9i

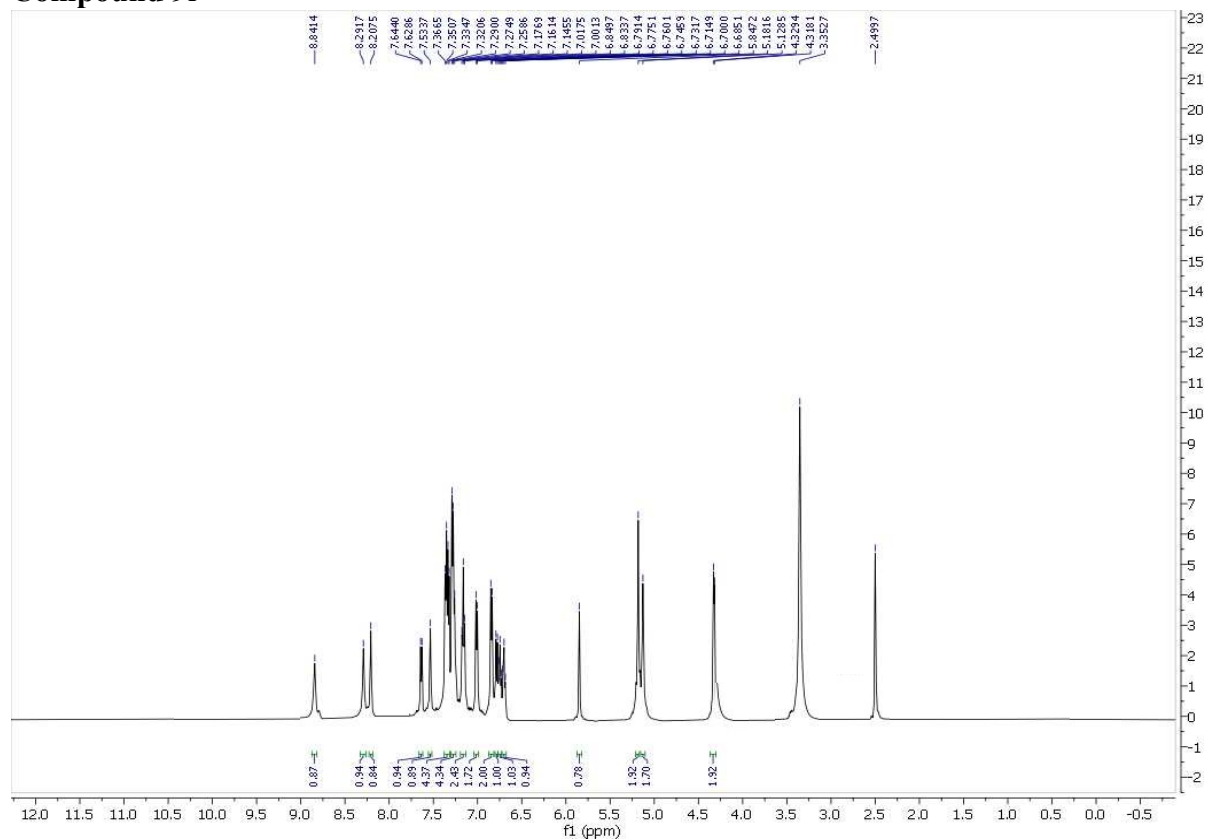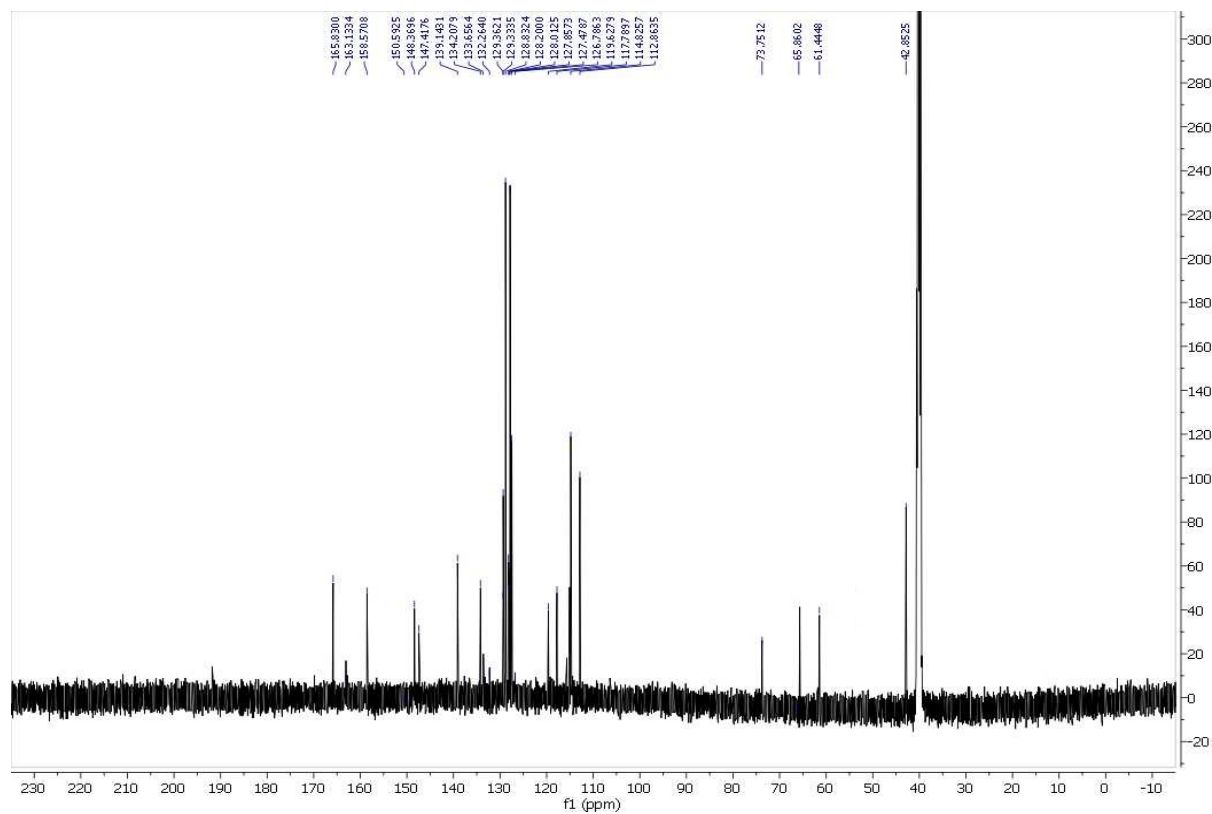



# Compound 9k

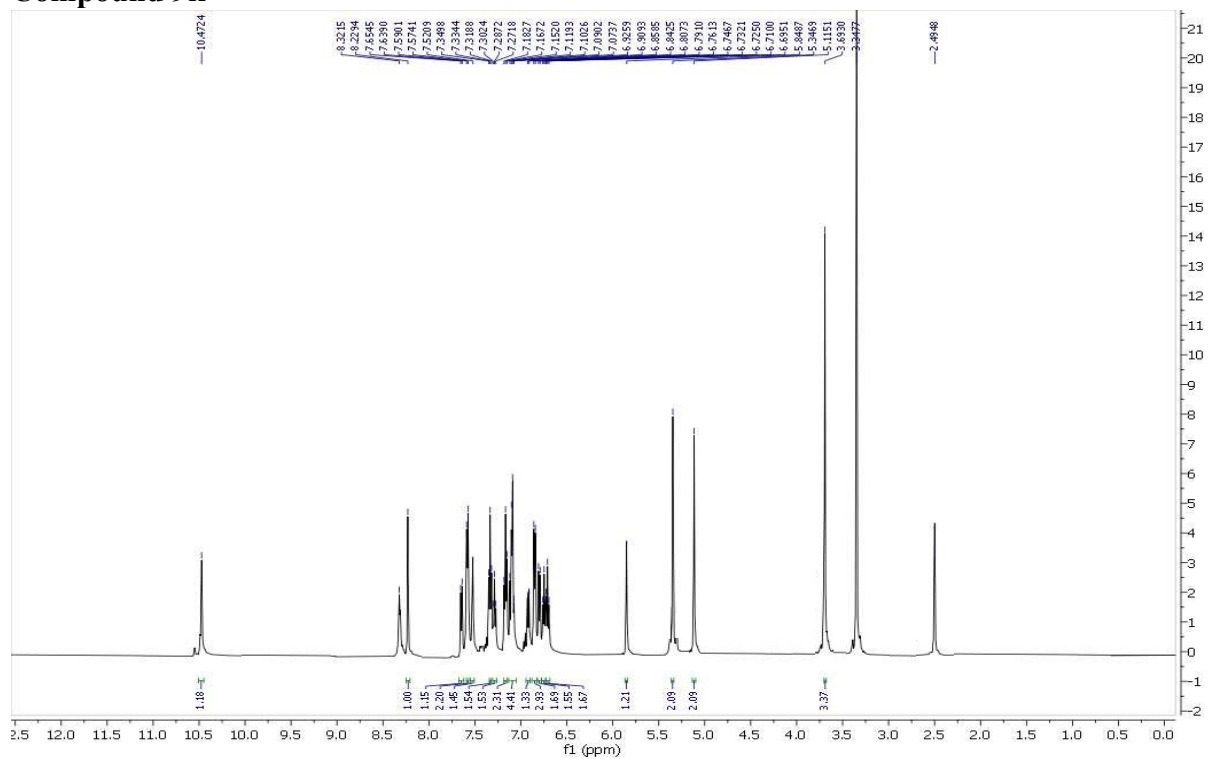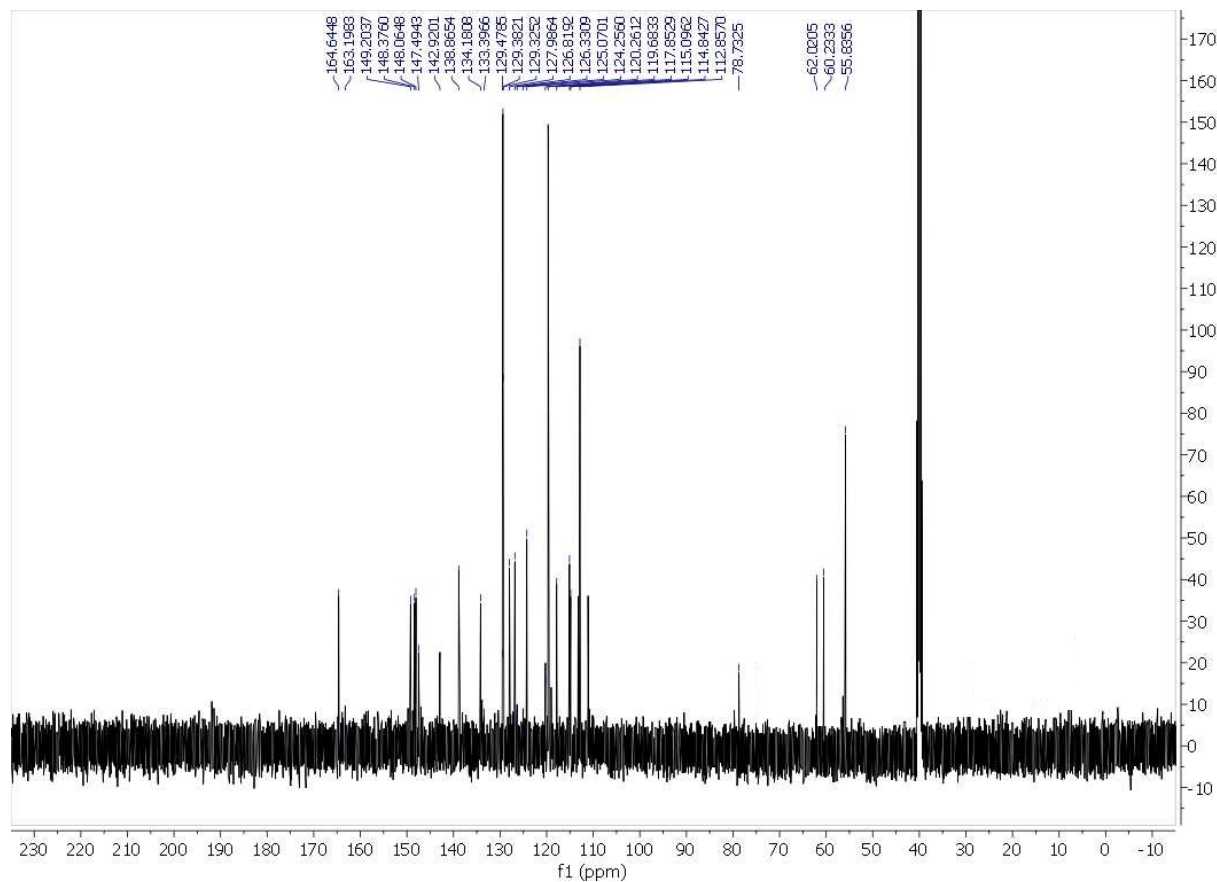

# Compound 9l

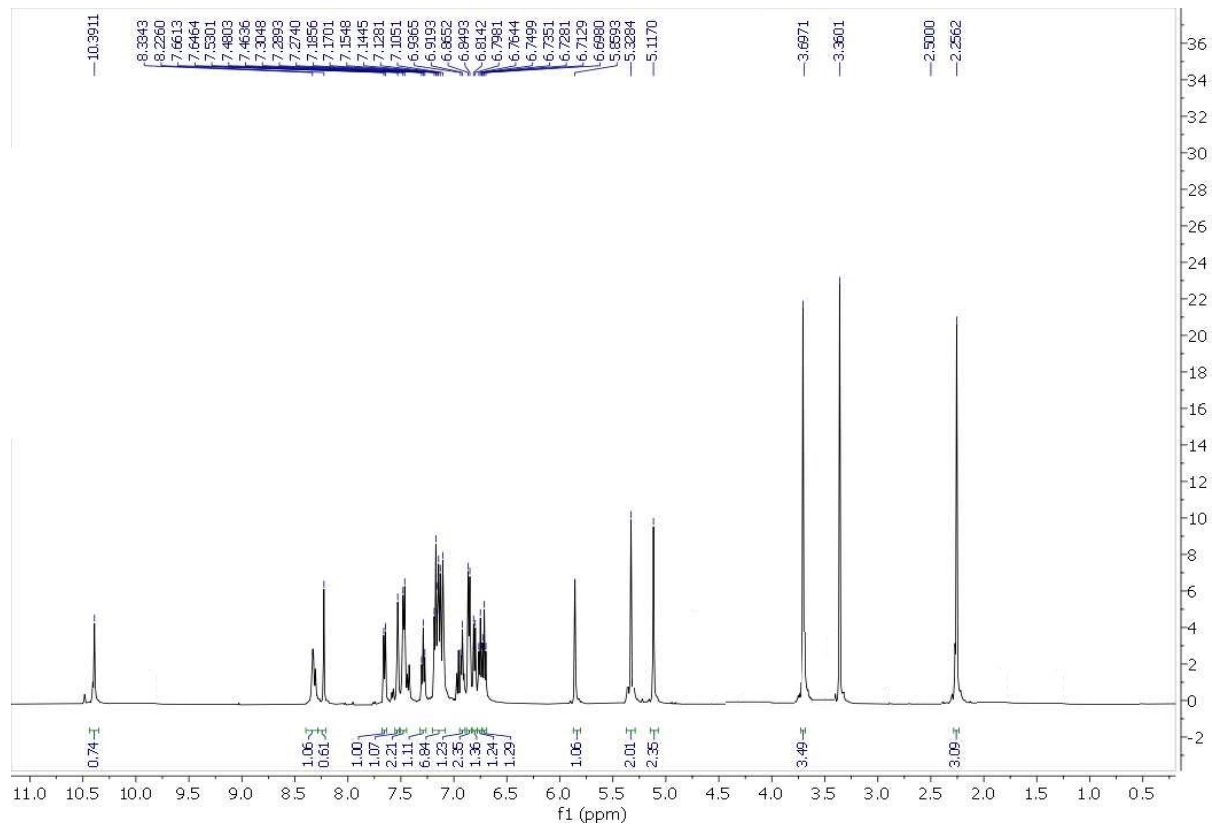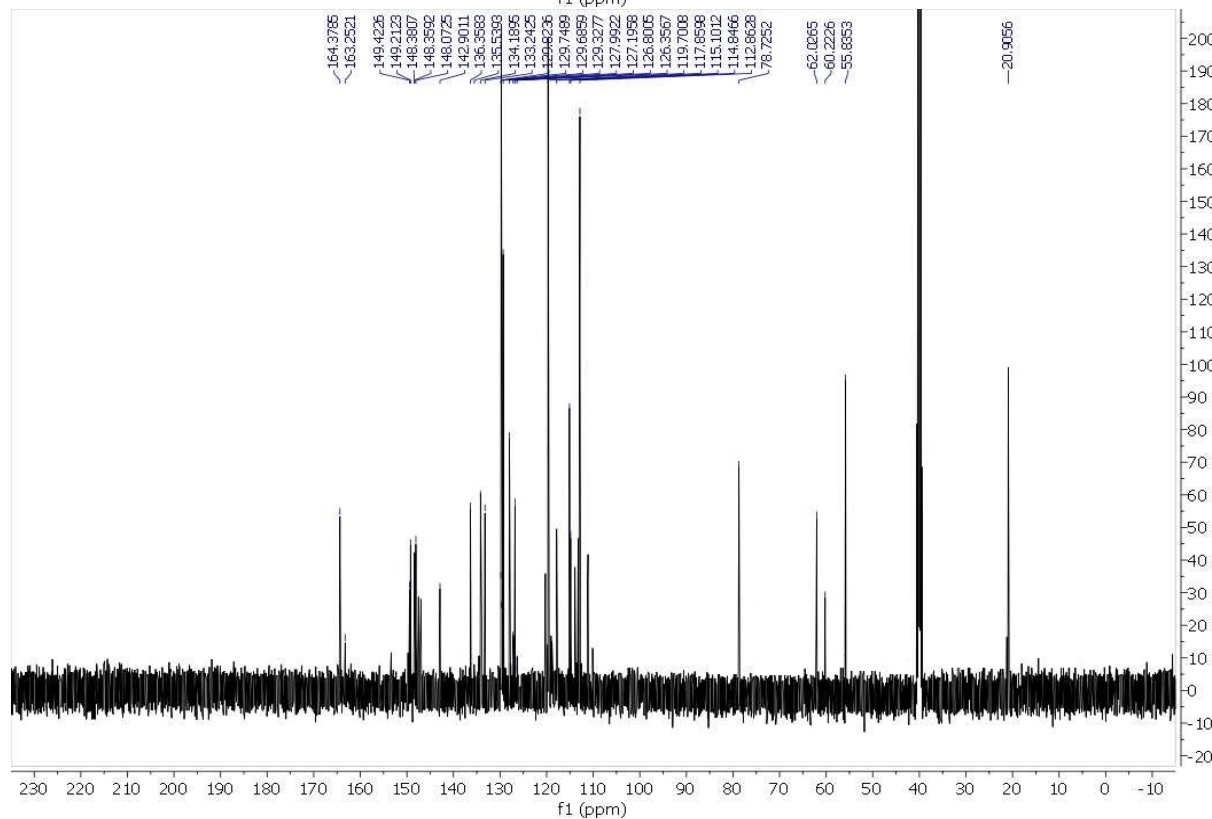

# Compound 9m

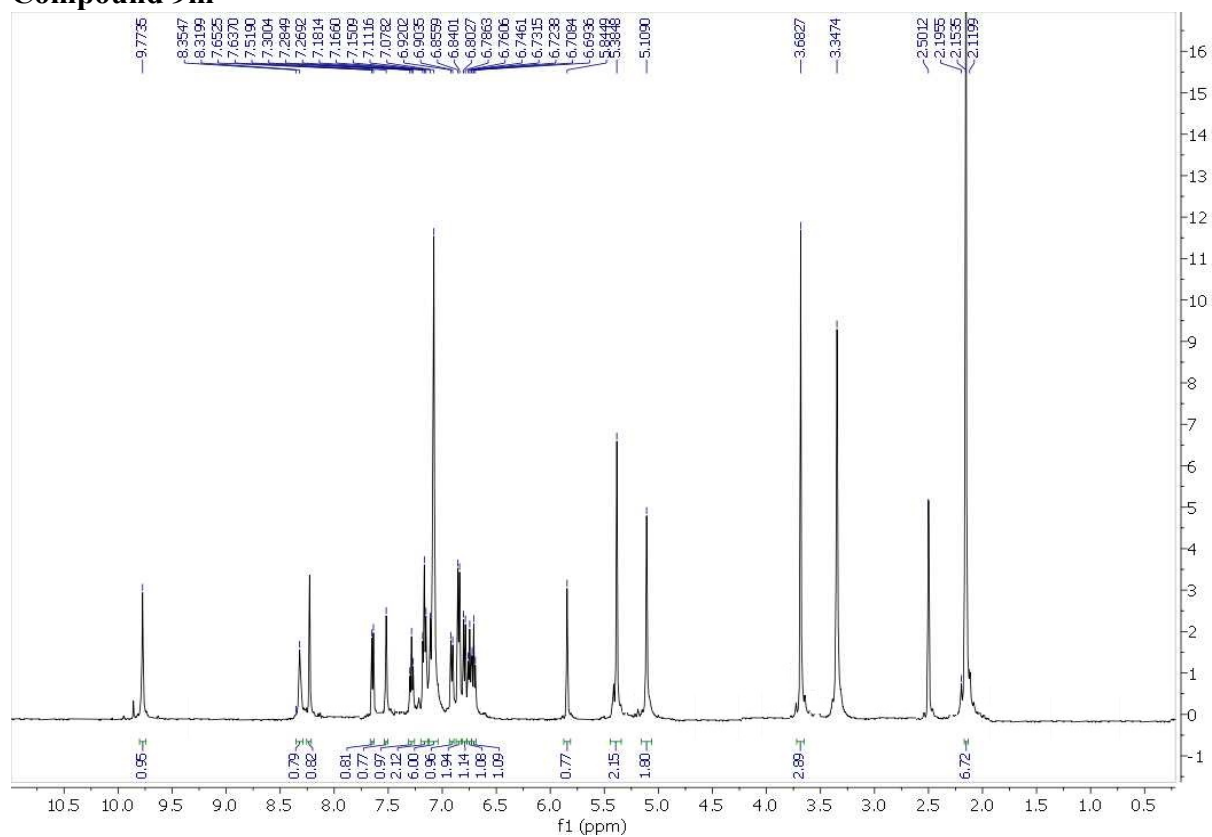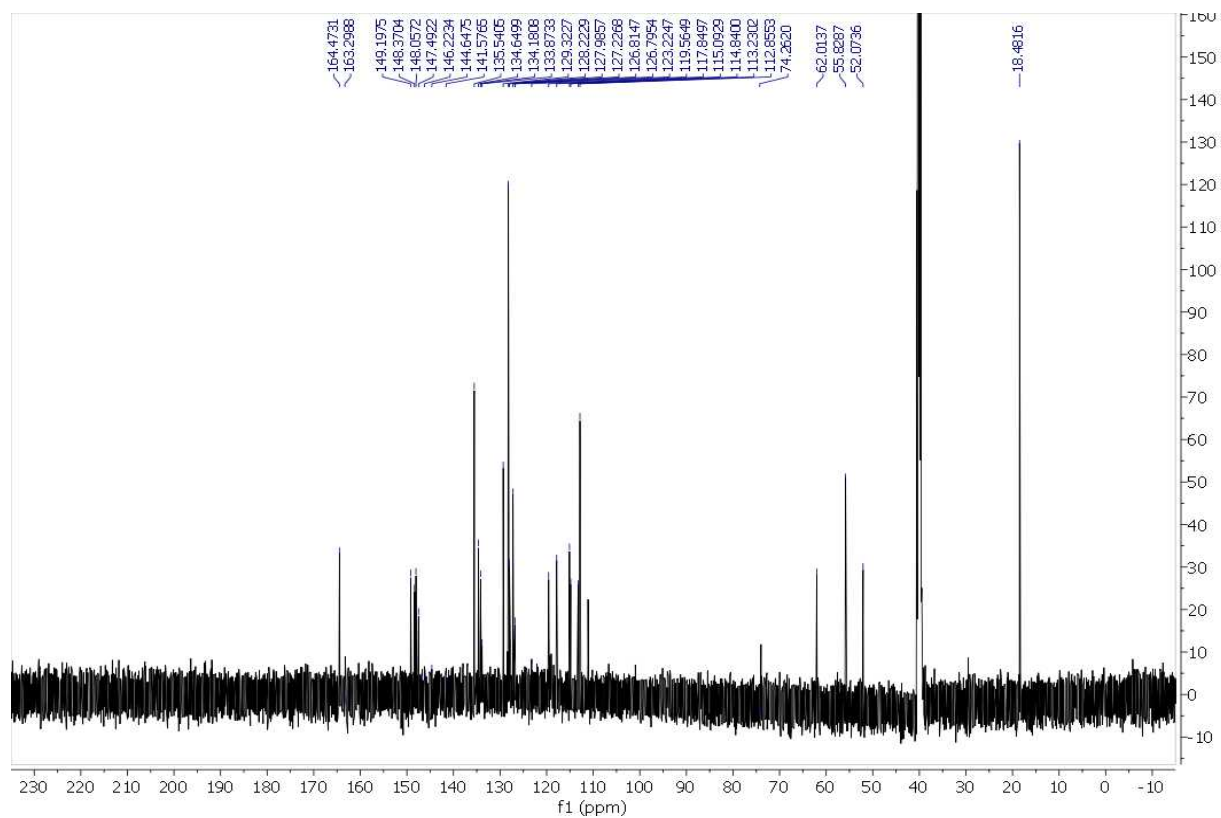

# Compound 9n

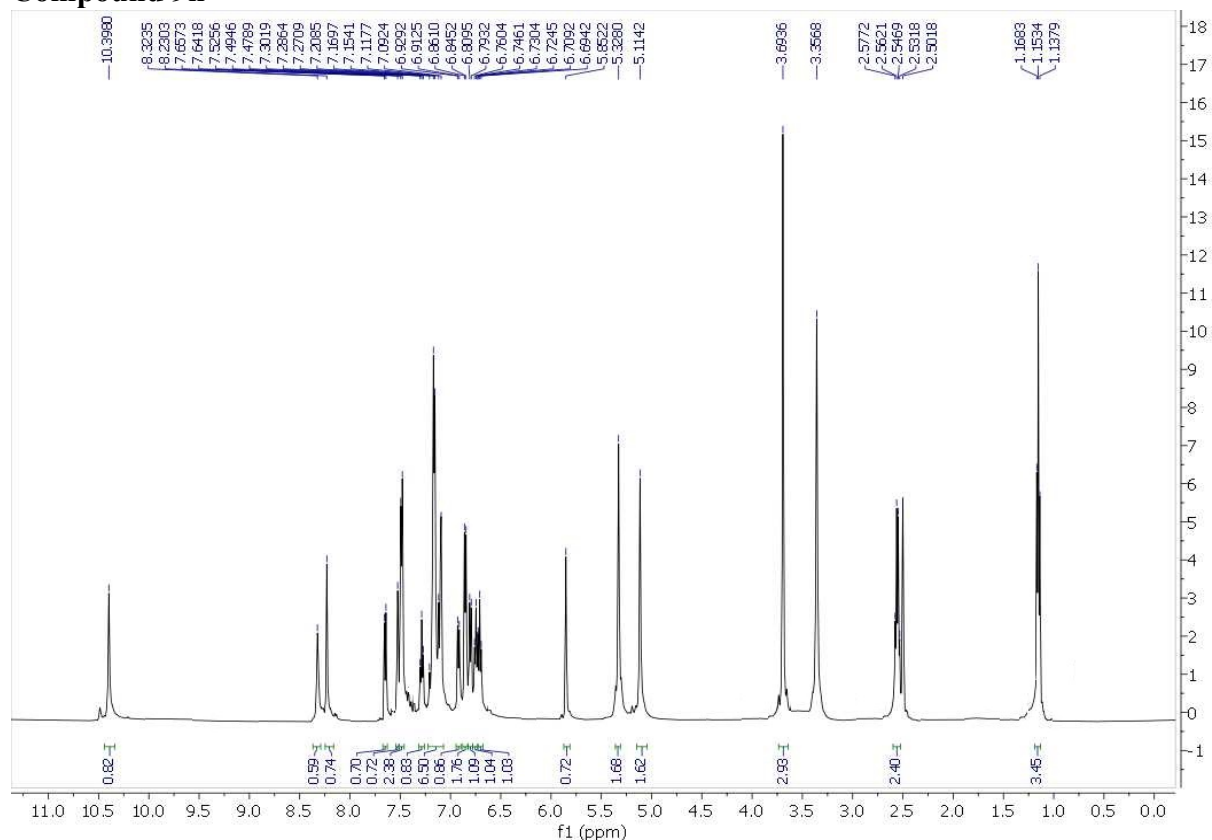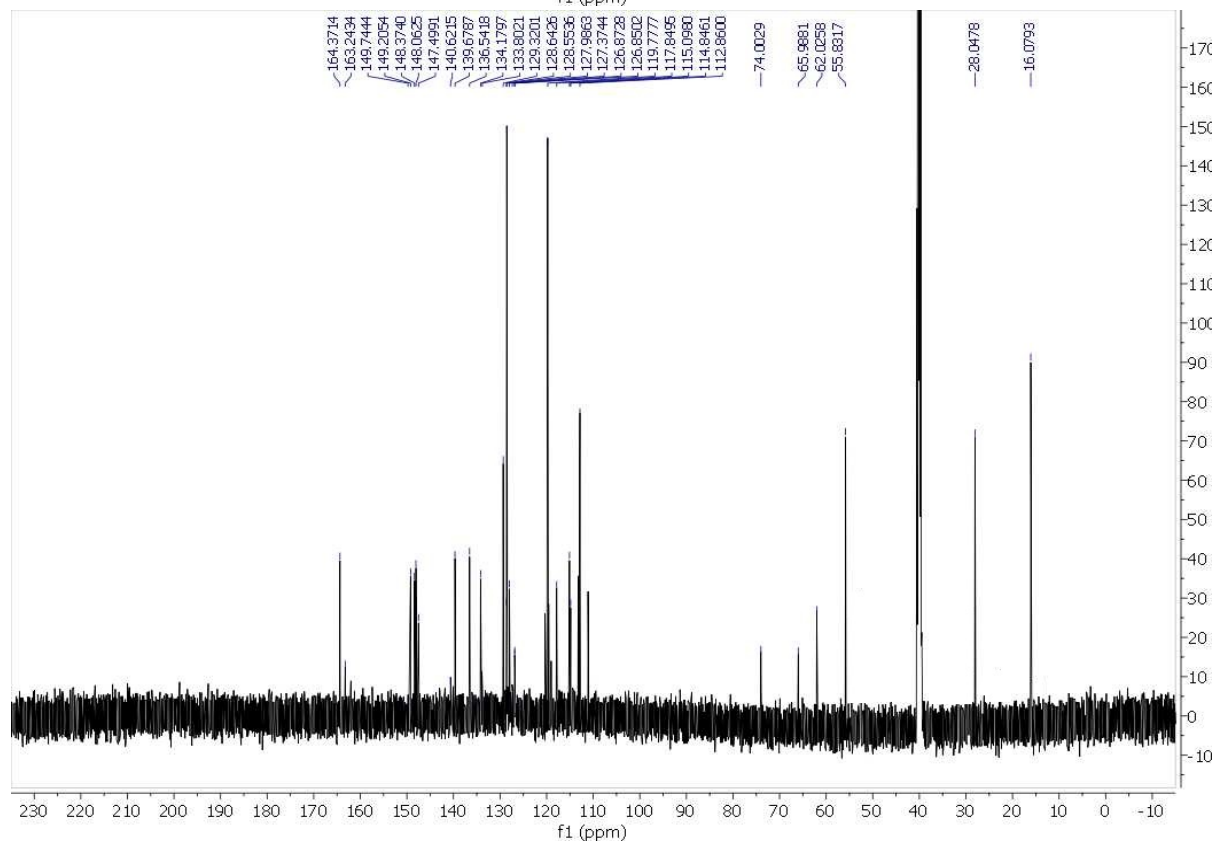

# Compound 9o

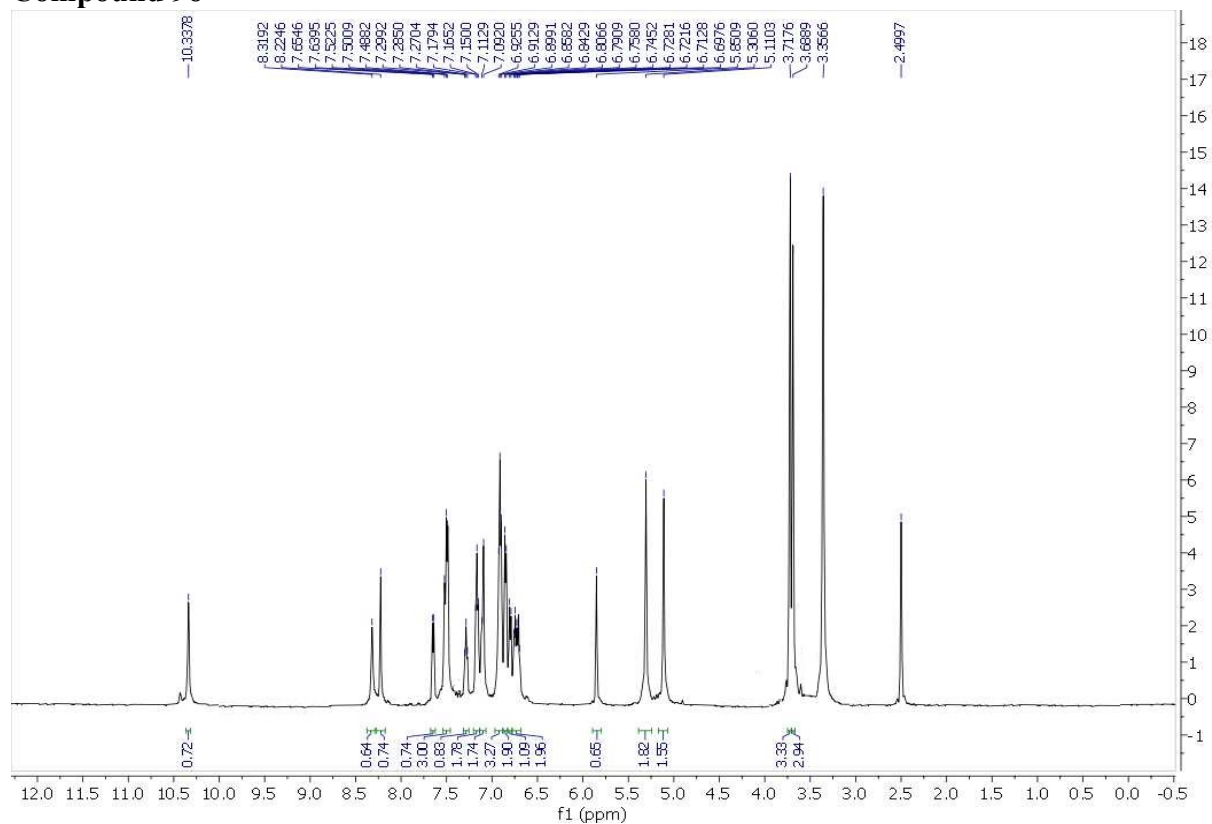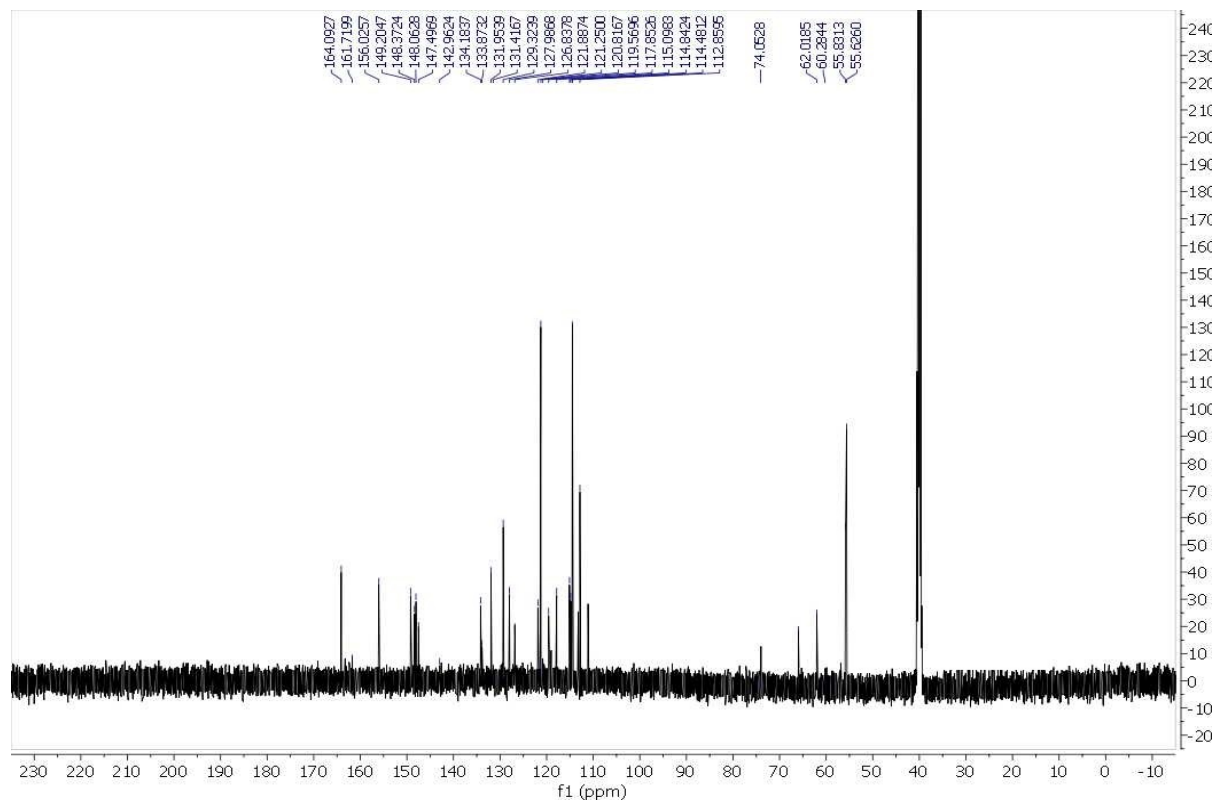

# Compound 9p

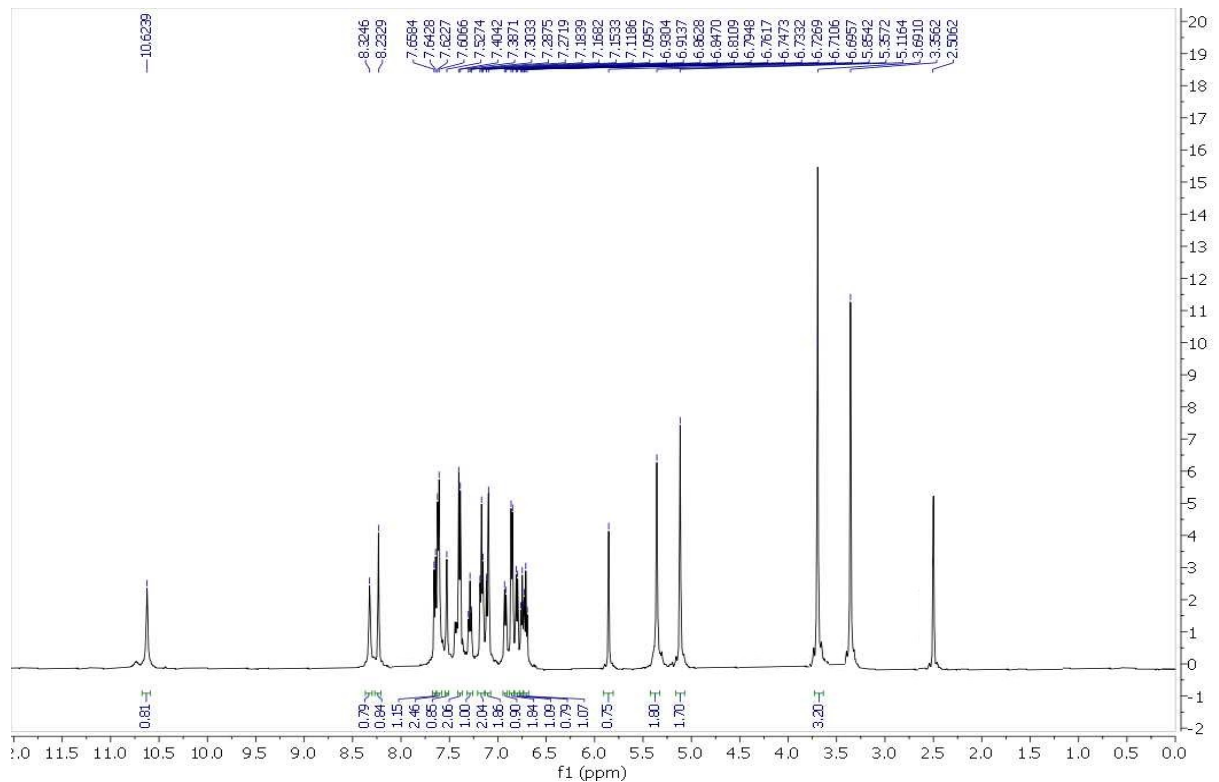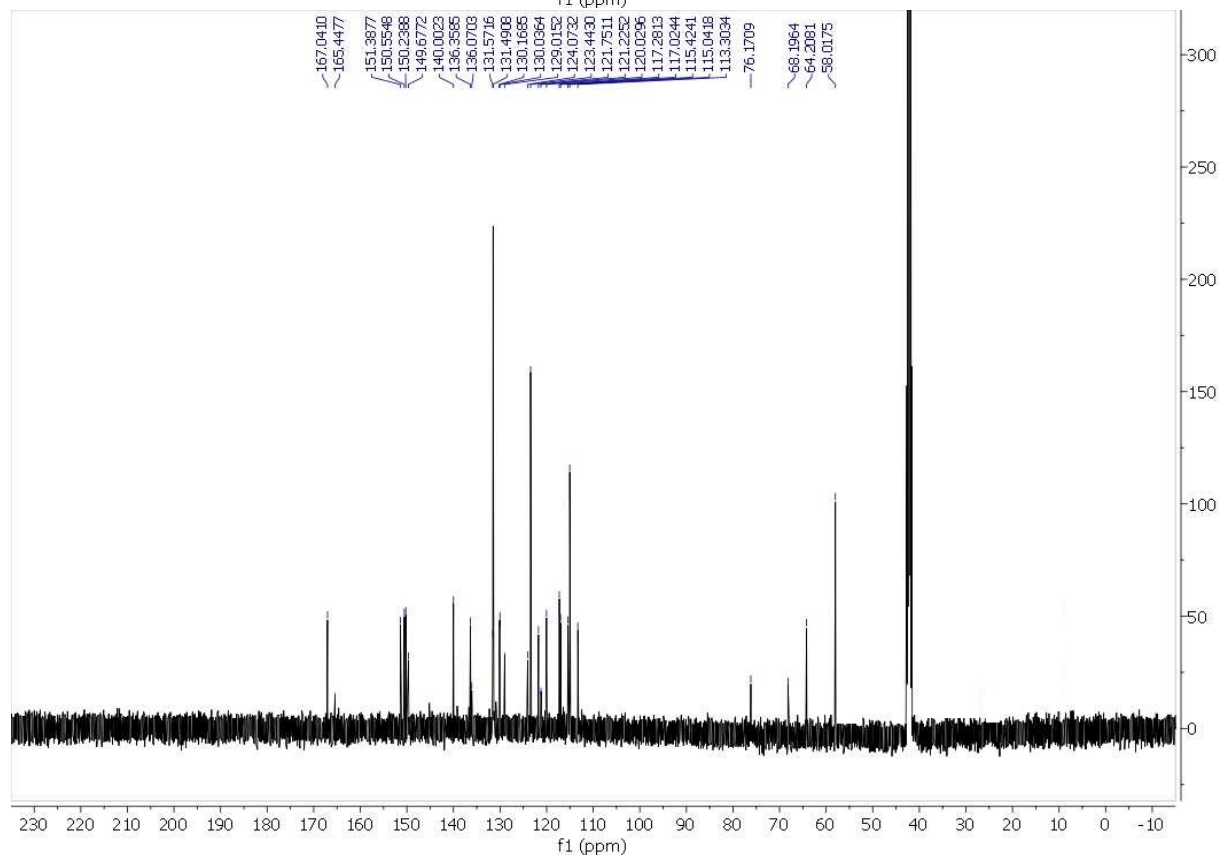



# Compound 9q

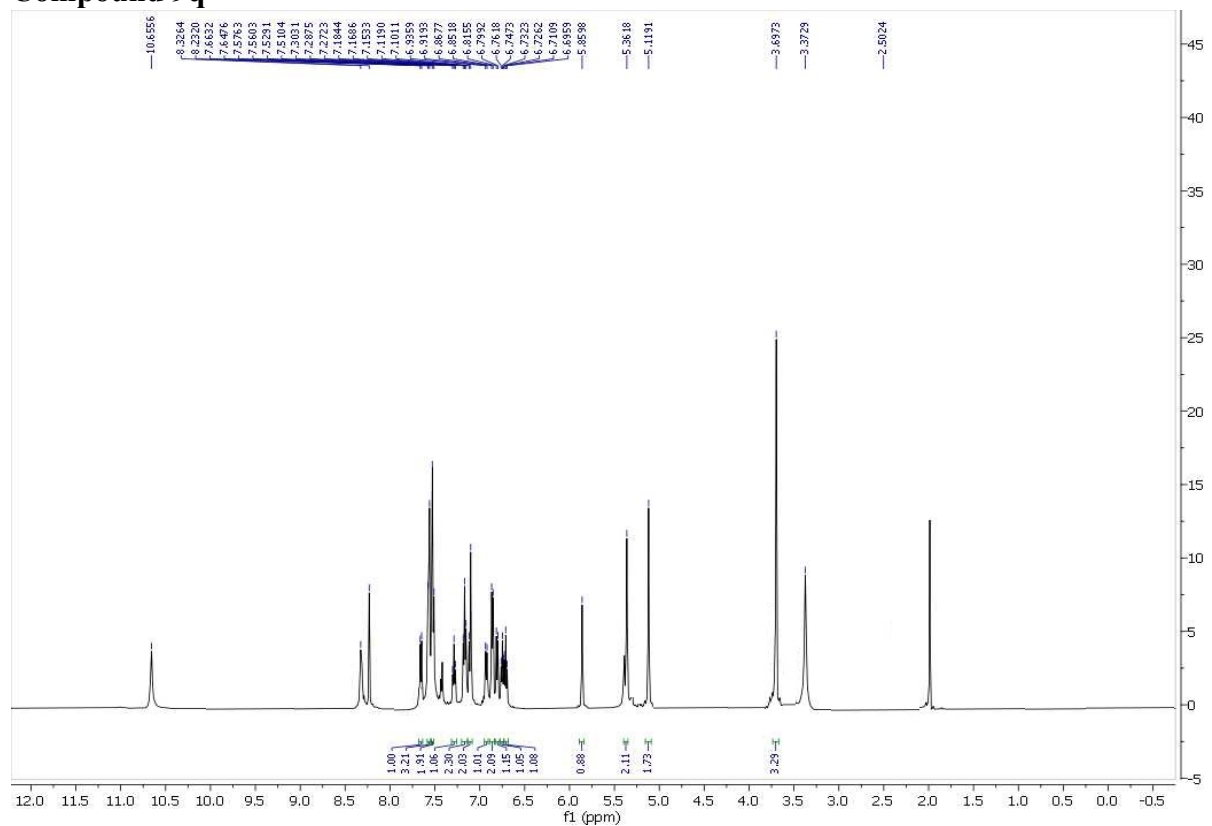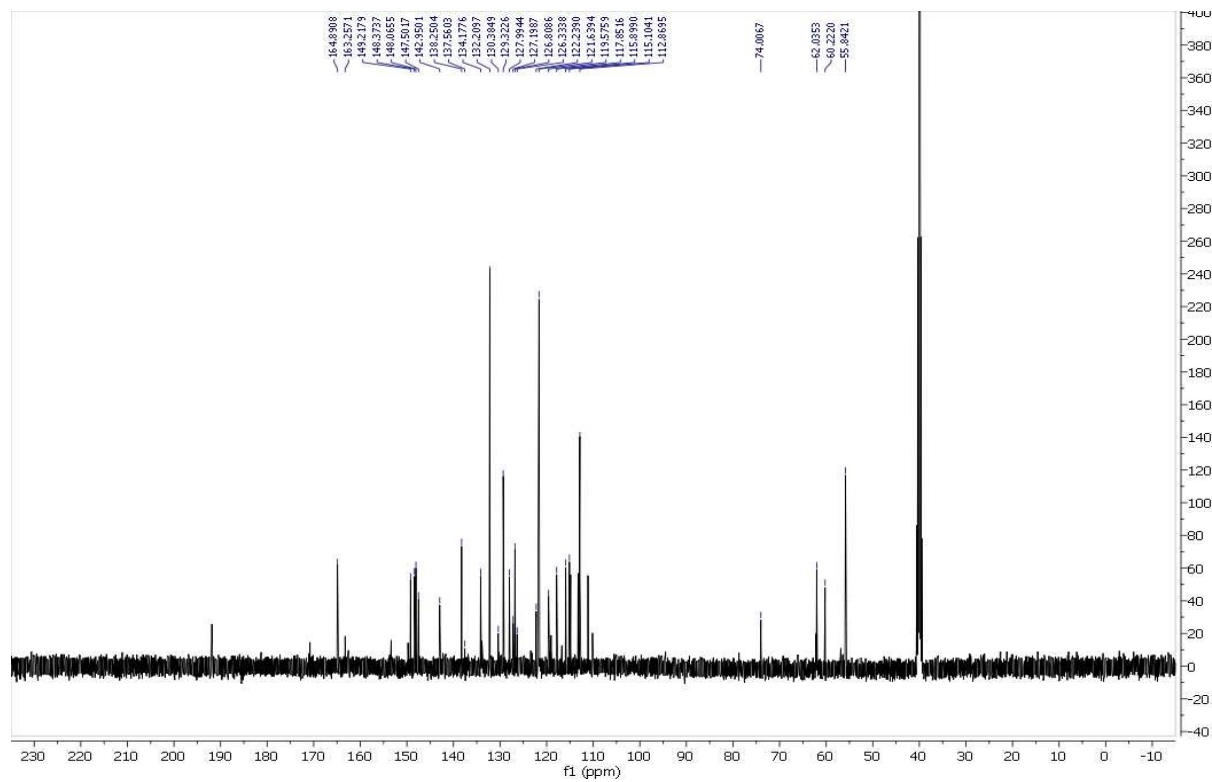

# Compound 9r

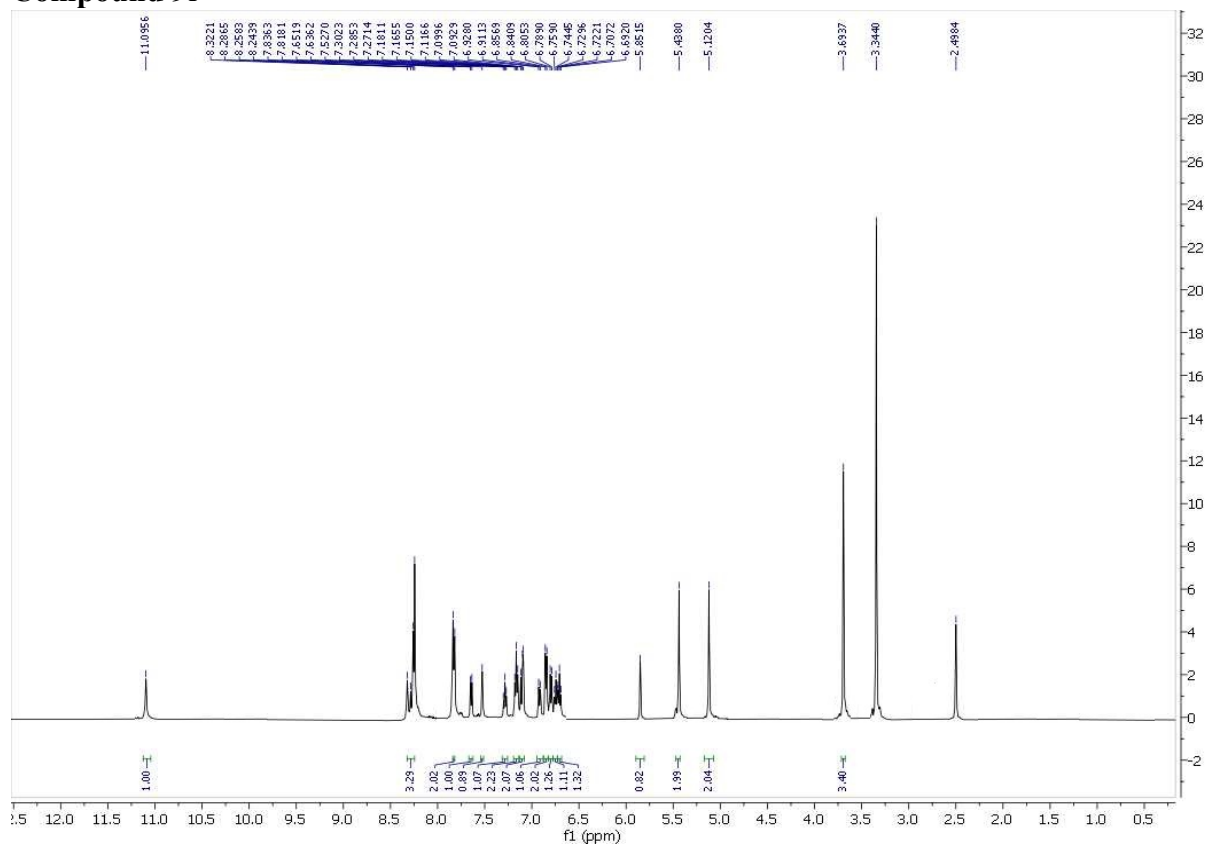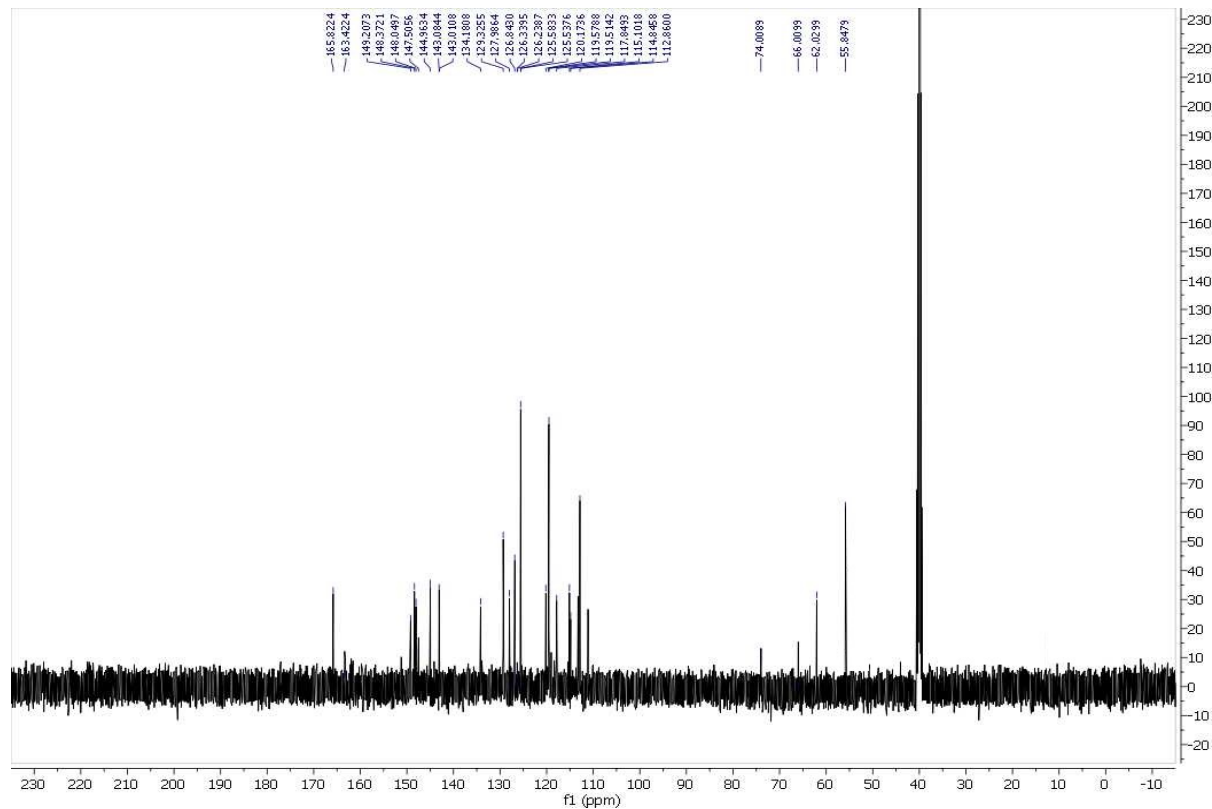

# Compound 9s

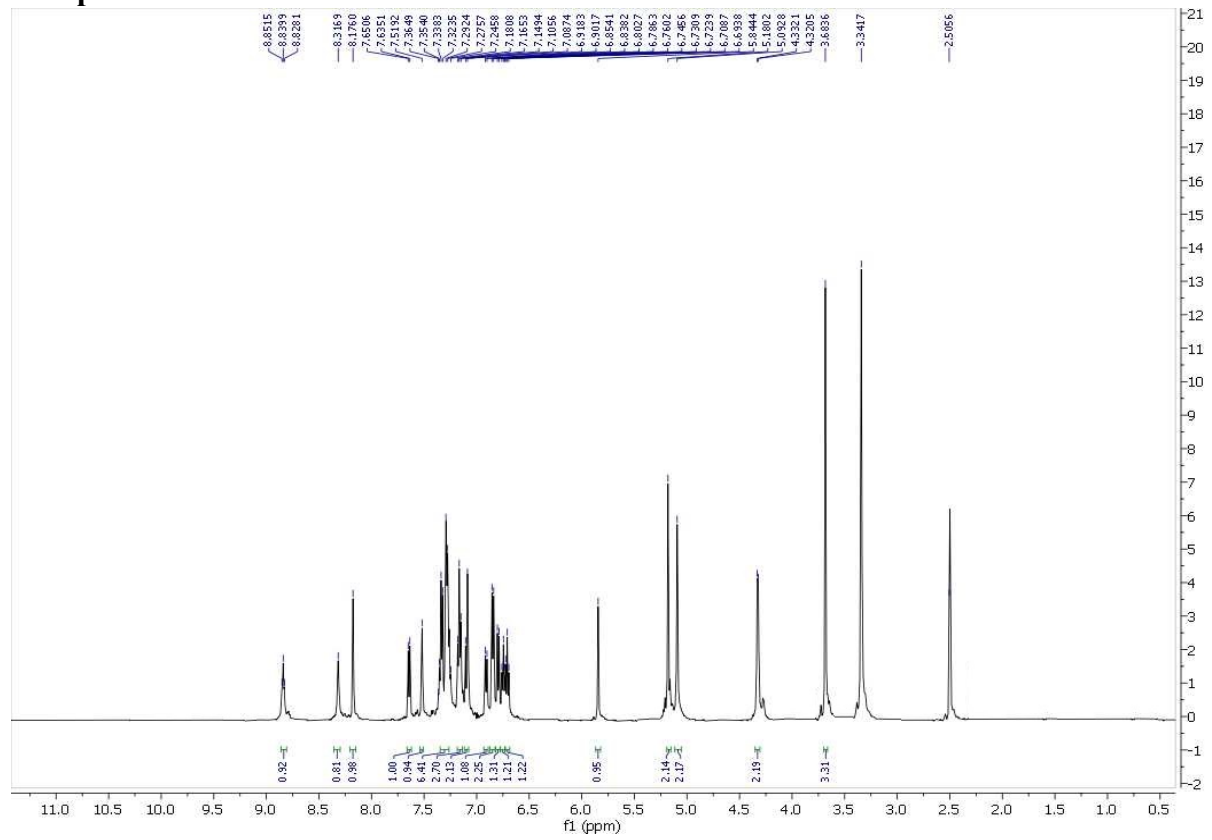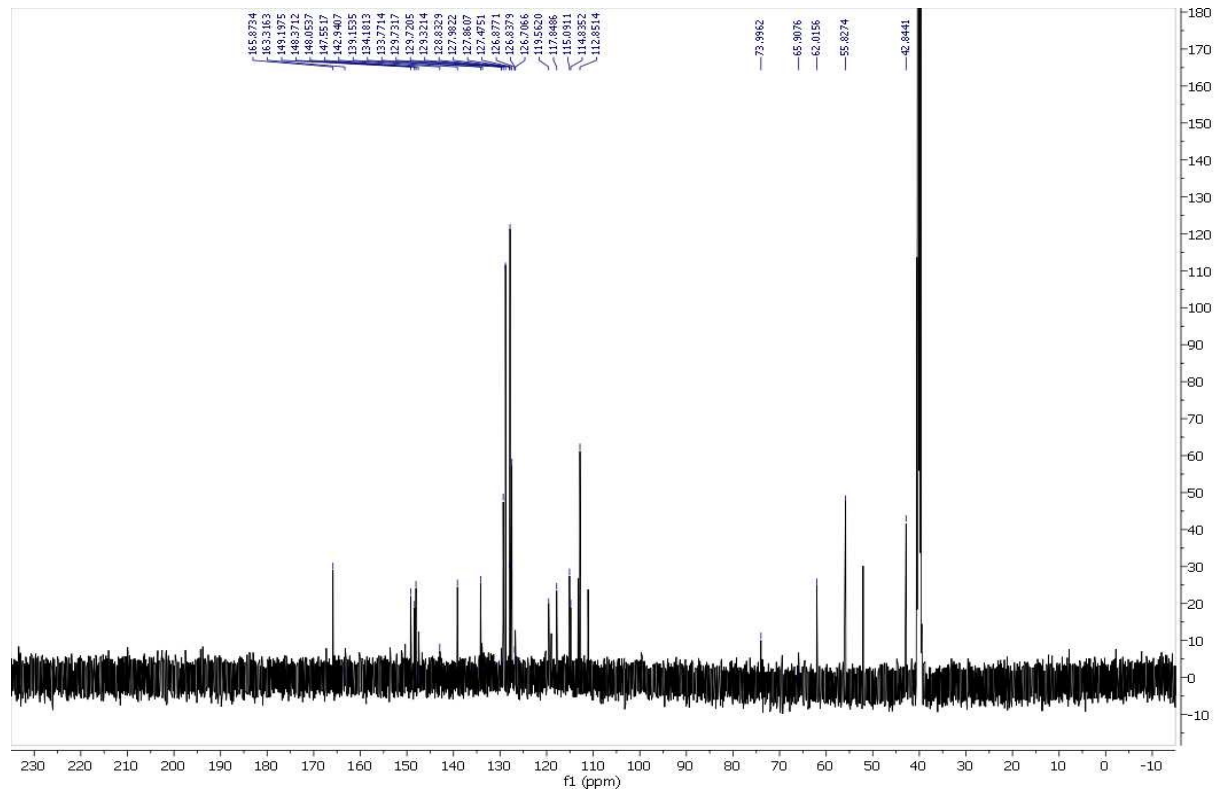

# Compound 9t

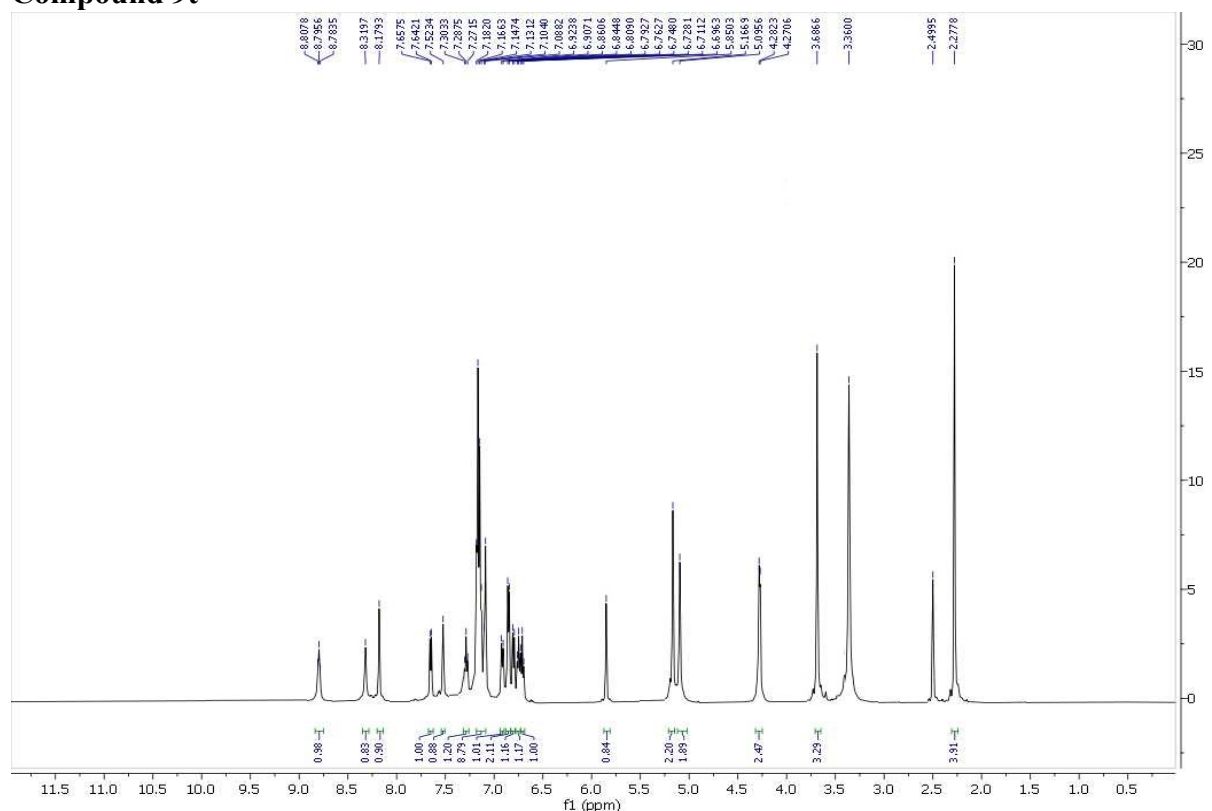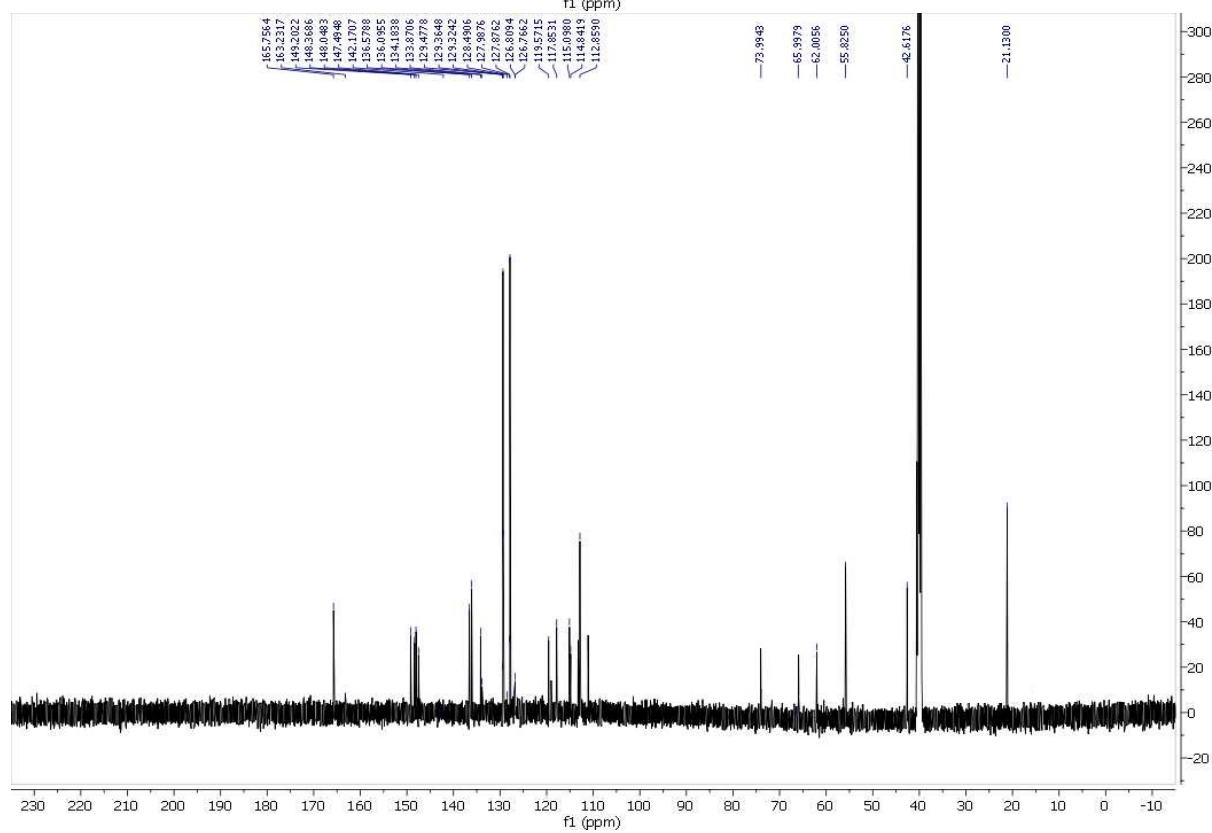

Supplement: d2md00297c1.pdf [file d2md00297c1.pdf]
